## CORRECTION

## Correction: Tissue-Specific Expressed Antibody Variable Gene Repertoires

Bryan S. Briney, Jordan R. Willis, Jessica A. Finn, Brett A. McKinney, James E. Crowe, Jr

[Fig 1](#) is incorrect. The authors have provided a corrected version here.

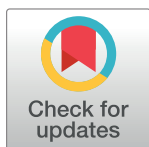**OPEN ACCESS**

**Citation:** Briney BS, Willis JR, Finn JA, McKinney BA, Crowe JE, Jr (2020) Correction: Tissue-Specific Expressed Antibody Variable Gene Repertoires. PLoS ONE 15(1): e0228412. <https://doi.org/10.1371/journal.pone.0228412>

**Published:** January 24, 2020

**Copyright:** © 2020 Briney et al. This is an open access article distributed under the terms of the [Creative Commons Attribution License](#), which permits unrestricted use, distribution, and reproduction in any medium, provided the original author and source are credited.

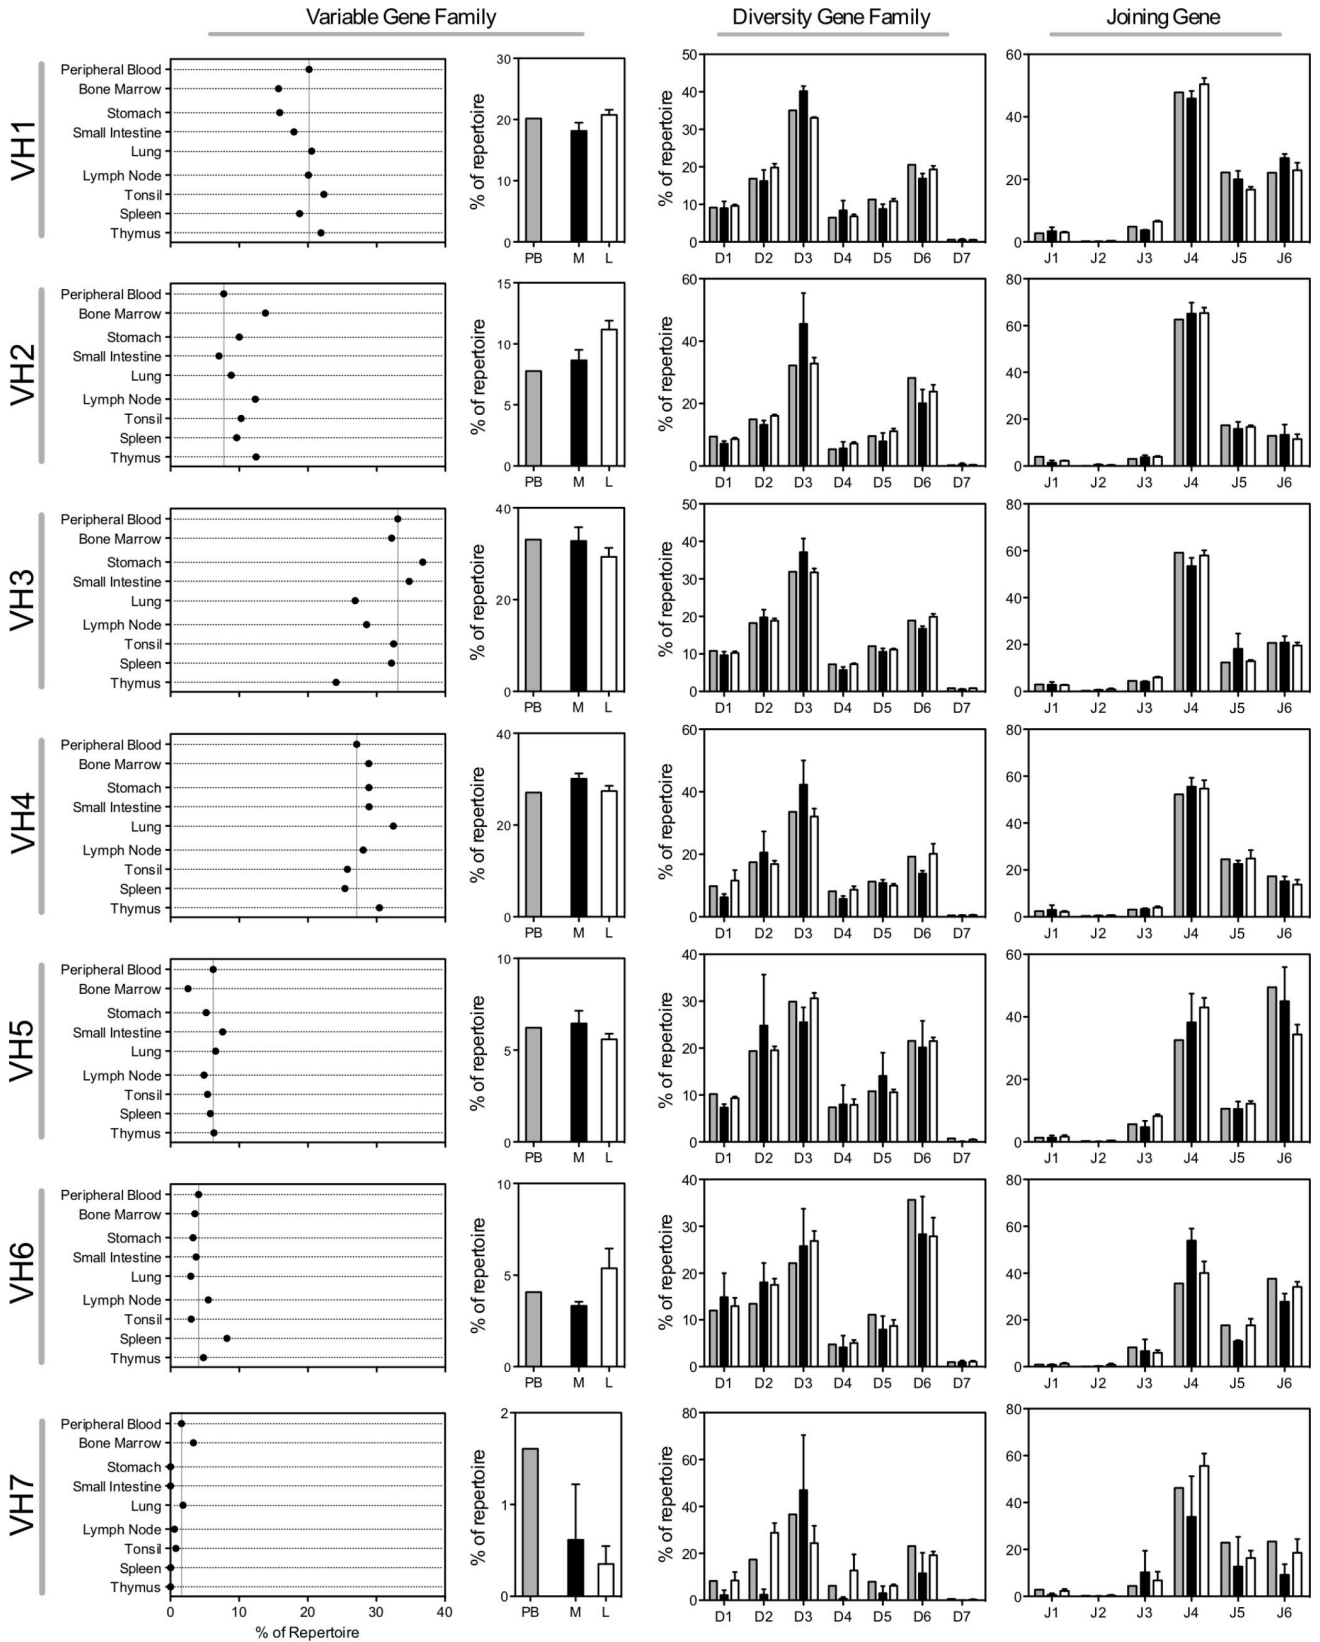

**Fig 1. Germline gene family use.** Starting from the left, the first column of panels shows the variable gene family use in peripheral blood, bone marrow, mucosal tissues (lung, small intestine, stomach) and lymphoid tissues (lymph node, tonsil, spleen and thymus). For easier comparison, the dashed vertical line in each panel represents the peripheral blood frequency. The second column of panels shows the variable gene use of peripheral blood and the combined variable gene family use of mucosal or lymphoid tissues. Bars indicate mean  $\pm$  SEM for each group of tissue samples. The third column of panels shows the diversity gene family use in peripheral blood (grey bars), mucosal tissues (black bars) and lymphoid tissues (white bars). Bars indicate mean  $\pm$  SEM for each group of tissue samples. The final column of panels shows the joining gene use. Colors are the same as the diversity gene family frequency panels. Bars indicate mean  $\pm$  SEM for each group of tissue samples.

<https://doi.org/10.1371/journal.pone.0228412.g001>

## Reference

1. Briney BS, Willis JR, Finn JA, McKinney BA, Crowe JE Jr (2014) Tissue-Specific Expressed Antibody Variable Gene Repertoires. *PLoS ONE* 9(6): e100839. <https://doi.org/10.1371/journal.pone.0100839> PMID: 24956460
